# Supplementary material for: Hydrogen transfer reactions in the presence of (Ni, Co)Mo-sulfide catalysts as an effective tool for hydrodechlorination: the role of the nature of lower alcohols
Source: Royal Society of Chemistry journal article supplement (doi:10.1039/d5nj03435c), 2025-12-12
Supplement: d5nj03435c1.pdf [file d5nj03435c1.pdf]

Supplementary materials

Hydrogen transfer reaction in the presence of (Ni, Co)Mo-sulfide catalysts as an effective tool  
for hydrodechlorination: the role of the nature of lower alcohols

Alexander Romanov,\*a Nikolai Nesterova, Vera Pakharukovaa, Igor Prosvirina, Anna  
Salomatinaa, Oleg Klimova and Oleg Martyanova

\*Corresponding author, E-mail address: ChemOneLove@mail.ru

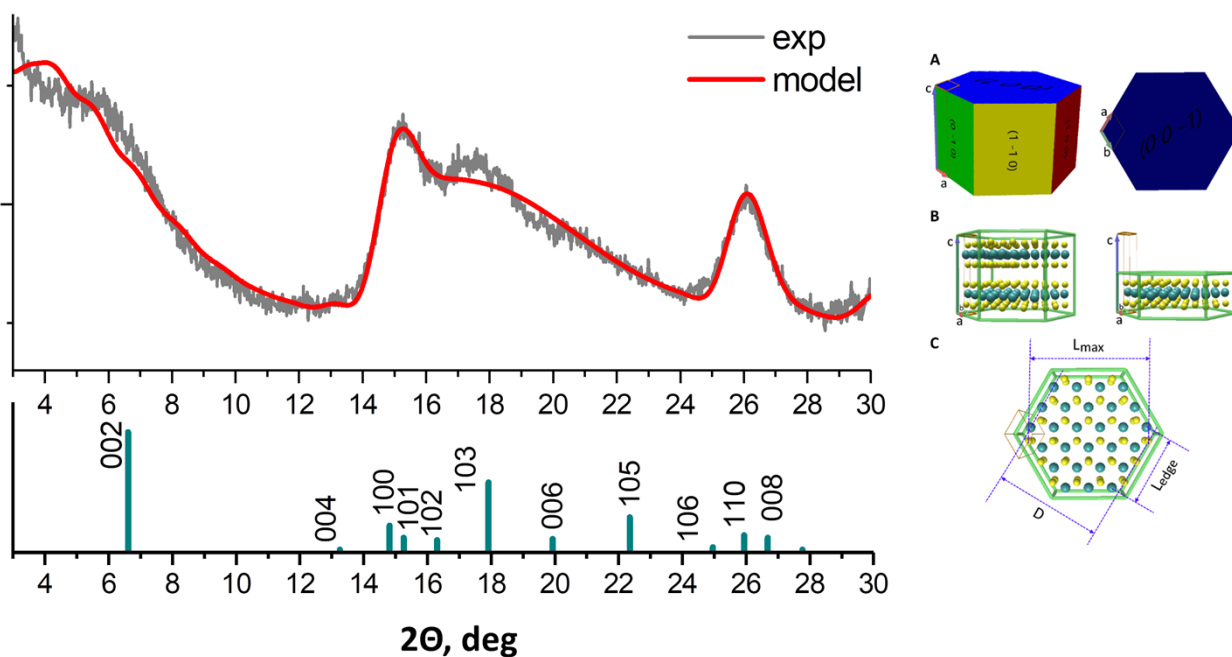

Figure S1. XRD data of the Mo<sub>13</sub>/Al<sub>2</sub>O<sub>3</sub> catalyst and the simulation curve of the sulfide system using Debye Function Analysis for single-layer MoS<sub>2</sub> crystallites ( $L_{max} = 3.5$  nm,  $D = 3.1$  nm).

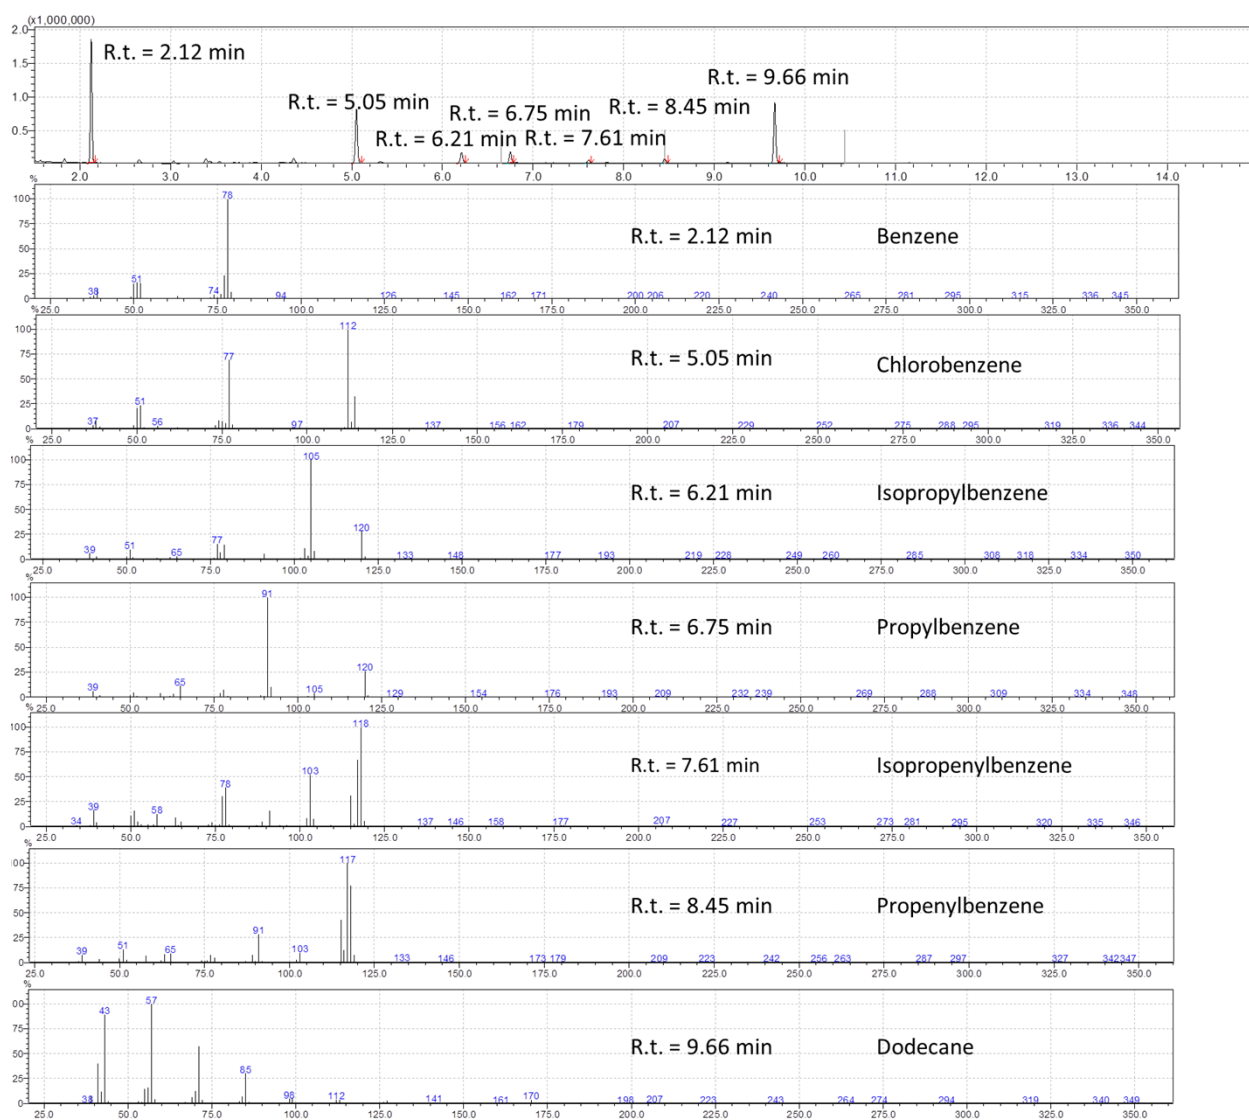

Figure S2. GCMS spectroscopy data for hydrodechlorination using Ni<sub>3</sub>Mo<sub>13</sub>/Al<sub>2</sub>O<sub>3</sub> catalyst in 2-PrOH medium after 40 minutes of the process.

Table S1. EDS mapping data for catalysts. Element mole ratio.

| Catalysts                                                        | Mo/S | Ni(Co)/S |
|------------------------------------------------------------------|------|----------|
| Ni <sub>3</sub> Mo <sub>13</sub> /Al <sub>2</sub> O <sub>3</sub> | 0.19 | 0.08     |
| Co <sub>3</sub> Mo <sub>13</sub> /Al <sub>2</sub> O <sub>3</sub> | 0.22 | 0.1      |
| Mo <sub>13</sub> /Al <sub>2</sub> O <sub>3</sub>                 | 0.23 | -        |
